# Supplementary material for: Typology of how ‘harmful commodity industries’ interact with local governments in England: a critical interpretive synthesis
Source: HighWire-hosted journal article supplement (doi:10.1136/bmjgh-2022-010216), 2023-01-01
Supplement: bmjgh-2022-010216supp001_data_supplement.pdf [file bmjgh-2022-010216supp001_data_supplement.pdf]

**Online Supplementary material**

**Article title:** Typology of how ‘harmful commodity industries’ interact with local governments in England: a critical interpretive synthesis

**Corresponding author:** Dr Sarah McKeivitt, Public Health Policy Evaluation Unit, School of Public Health, Imperial College London

[s.mckeivitt@imperial.ac.uk](mailto:s.mckeivitt@imperial.ac.uk)

**Contents**

1. Adapted PRISMA-ScR checklist
2. Review search strategy
3. Study eligibility and selection
4. Review and analysis of grey literature
5. Studies not selected for inclusion
6. Description of included studies
7. List of example interactions

**Supplementary Table 1.** ADAPTED Preferred Reporting Items for Systematic reviews and Meta-Analyses extension for Scoping Reviews (*adapted* PRISMA-ScR) Checklist

| SECTION                   | #  | Adapted PRISMA-ScR CHECKLIST ITEM                                                                                                                                                                                                 | PAGE     |
|---------------------------|----|-----------------------------------------------------------------------------------------------------------------------------------------------------------------------------------------------------------------------------------|----------|
| <b>ABSTRACT</b>           |    |                                                                                                                                                                                                                                   |          |
| Summary                   | 1  | Provide a structured summary that includes (as applicable): background, objectives, eligibility criteria, sources of evidence, charting methods, results, and conclusions that relate to the objectives.                          | 3        |
| <b>INTRODUCTION</b>       |    |                                                                                                                                                                                                                                   |          |
| Rationale                 | 2  | Describe the rationale for the review in the context of what is already known. Explain why the review questions/objectives lend themselves to the approach.                                                                       | 5        |
| Objectives                | 3  | Provide an explicit statement of the questions and objectives being addressed with reference to their key elements (e.g., population, concepts, and context) or other relevant key elements used to conceptualize the objectives. | 6        |
| <b>METHODS</b>            |    |                                                                                                                                                                                                                                   |          |
| Protocol and registration | 4  | Indicate whether a review protocol exists; state if and where it can be accessed (e.g., a Web address); and if available, provide registration (number).                                                                          | 6        |
| Eligibility criteria      | 5  | Specify characteristics of the sources of evidence used as eligibility criteria (e.g., years considered, language, and publication status), and provide a rationale.                                                              | 6-7      |
| Information sources       | 6  | Describe all information sources in the search (e.g., databases with dates of coverage and additional sources), as well as the date of the most recent search.                                                                    | 7        |
| Search                    | 7  | Present the full electronic search strategy for at least 1 database, including any limits used, such that it could be repeated.                                                                                                   | Sup3     |
| Selection                 | 8  | State the process for selecting sources of evidence (screening and eligibility)                                                                                                                                                   | 7-8      |
| Data charting             | 9  | Describe the methods of charting data from the included sources of evidence                                                                                                                                                       | 8        |
| Data items                | 10 | List and define all data variables sought and any assumptions and simplifications                                                                                                                                                 | 8        |
| Critical appraisal        | 11 | If appropriate, provide a rationale for conducting a critical appraisal of included sources of evidence (rationale why not)                                                                                                       | 8        |
| Synthesis                 | 12 | Describe the methods of handling and summarizing the data                                                                                                                                                                         | 8-9      |
| <b>RESULTS</b>            |    |                                                                                                                                                                                                                                   |          |
| Study selection           | 13 | Give numbers of sources screened, assessed for eligibility, and included in the review, with reasons for exclusions at each stage, ideally using a flow diagram.                                                                  | 9        |
| Study characteristics     | 14 | For each source of evidence, present characteristics and provide the citations.                                                                                                                                                   | Sup5 & 7 |
| Results                   | 15 | For each included source of evidence, present the relevant data that were charted that relate to the review questions and objectives.                                                                                             | 13-15    |
| Synthesis                 | 16 | Summarize results as they relate to the review questions and objectives.                                                                                                                                                          | 10-12    |
| <b>DISCUSSION</b>         |    |                                                                                                                                                                                                                                   |          |
| Summary of evidence       | 17 | Summarize the main results (including an overview of concepts, themes, and types of evidence available), link to the review questions and objectives, and relevance to key groups.                                                | 16       |
| Limitations               | 18 | Discuss the limitations of the review process.                                                                                                                                                                                    | 16       |
| Conclusions               | 19 | Provide a general interpretation of the results with respect to the review questions and objectives, as well as potential implications and/or next steps.                                                                         | 17-18    |
| <b>FUNDING</b>            |    |                                                                                                                                                                                                                                   |          |
| Funding                   | 20 | Describe sources of funding for the included sources of evidence, as well as sources of funding for the scoping review. Describe the role of the funders.                                                                         | 19       |

JB1 = Joanna Briggs Institute; PRISMA-ScR = Preferred Reporting Items for Systematic reviews and Meta-Analyses extension for Scoping Reviews; SUP(n) = supplementary file number. \*The frameworks by Arksey and O'Malley (6) and Levac and colleagues (7) and the JBI guidance (4, 5) refer to the process of data extraction in a scoping review as data charting. *Adapted From:* Tricco AC, Lillie E, Zarin W, O'Brien KK, Colquhoun H, Levac D, et al. PRISMA Extension for Scoping Reviews (PRISMA-ScR): Checklist and Explanation. *Ann Intern Med.* 2018;169:467–473. doi: [10.7326/M18-0850](https://doi.org/10.7326/M18-0850).

**Supplementary Table 2. Review search strategy****2. A) Search topics, terms, and database logic**

Date of search 17/06/21

| Topic                                     | Ref | Terms                                                                                                                                                                                                                                                                                                                                                                                                                                                                                                                                                                                                                                                                                                                                                                                                                                                                                             |
|-------------------------------------------|-----|---------------------------------------------------------------------------------------------------------------------------------------------------------------------------------------------------------------------------------------------------------------------------------------------------------------------------------------------------------------------------------------------------------------------------------------------------------------------------------------------------------------------------------------------------------------------------------------------------------------------------------------------------------------------------------------------------------------------------------------------------------------------------------------------------------------------------------------------------------------------------------------------------|
| <b>Environment</b>                        | #1  | <b>TITLE</b> "commercial determinant*" OR "commercial involve*" OR "commercial epidemic" OR "commercial pandemic" OR "macrosocial determinant*" OR "corporate determinant*" OR "corporate involve*" OR "corporate epidemic" OR "corporate pandemic" OR "industry determinant*" OR "industrial determinant*" OR "industrial involve*" OR "industry involve*" OR "industry epidemic" OR "industrial pandemic" OR "unhealthy commodit*" OR "harmful commodit*" OR corporatology                                                                                                                                                                                                                                                                                                                                                                                                                      |
| <b>Industry</b>                           | #2  | <b>TITLE</b> (Food OR Sugar OR Transfats OR "Ultra-process*" OR Alcohol OR Drink* OR Beverage OR Tobacco OR Cigarette OR Nicotine OR Smok* OR Gamb1* OR Commerc* OR "For-profit" OR Transnational OR Private)<br><br>AND <b>TITLE</b> (Industr* OR Big OR Corporat* OR Determinant* OR Compan* OR Firm* OR Manufactur* OR Organisation* OR Organization* OR Sector* OR Environment)                                                                                                                                                                                                                                                                                                                                                                                                                                                                                                               |
| <b>Interaction</b>                        | #3  | <b>TOPIC</b> (Activit* OR Advertis* OR Advis* OR Agreement* OR Capture OR CDOH OR citizenship OR "Civil society capture" OR Collaborat* OR Communicat* OR "Concerned citizenship" OR Conflict* OR "Constituency building" OR Cooperat* OR Coopt OR "co-opt" OR "Corporate social responsibility" OR "Corporate-state" OR "Corporation-induced" OR CSR OR Determinant* OR Deregulat* OR Donat* OR "Financial incent*" OR "Framing dominant" OR Fund* OR Health OR Influenc* OR Interact* OR Invest OR Invested OR Investment OR Investor OR Investing OR Involve* OR Joint OR Lobby* OR Neoliberal OR "Neo-liberal" OR "Non-market strateg*" OR partner* OR Philanthrop* OR Playbook OR "Policy capture" OR Power OR Practice* OR "Preference shaping" OR "Private-public" OR "Public-private" OR Relation* OR Spinning OR Sponsor* OR "State-corporate" OR Strateg* OR Support* OR Tactic OR Tie) |
| <b>Framework</b>                          | #4  | <b>TOPIC</b> (Appraisal OR Categori* OR Classif* OR Codif* OR Conceptuali* OR Framework OR Mechanism* OR Model OR Schema OR Taxonom* OR Theory OR Trend* OR Typif* OR Typolog* OR Overview)                                                                                                                                                                                                                                                                                                                                                                                                                                                                                                                                                                                                                                                                                                       |
|                                           | #5  | #2 AND #3 AND #4                                                                                                                                                                                                                                                                                                                                                                                                                                                                                                                                                                                                                                                                                                                                                                                                                                                                                  |
|                                           | #6  | #1 OR #5                                                                                                                                                                                                                                                                                                                                                                                                                                                                                                                                                                                                                                                                                                                                                                                                                                                                                          |
| <b>Additional NOT filters<sup>1</sup></b> | #7  | <b>TITLE</b> (Healthcare OR Hospital OR Gene OR Genom* OR Genetic* OR Genotyp* OR Trial OR Intervention)                                                                                                                                                                                                                                                                                                                                                                                                                                                                                                                                                                                                                                                                                                                                                                                          |
|                                           | #8  | #6 NOT #7                                                                                                                                                                                                                                                                                                                                                                                                                                                                                                                                                                                                                                                                                                                                                                                                                                                                                         |
| <b>Filters:</b>                           |     | <b>English language, de-duplicate (remove duplicates)<sup>2</sup>.</b><br><b>Human filter (see table below)</b>                                                                                                                                                                                                                                                                                                                                                                                                                                                                                                                                                                                                                                                                                                                                                                                   |

<sup>1</sup>only if needed after preliminary screen. <sup>2</sup>Remove duplicates within and across databases.

| Database specific logic                |                                    |                |                                 |                                 |
|----------------------------------------|------------------------------------|----------------|---------------------------------|---------------------------------|
| PubMed                                 | Scopus                             | Web of science | Ebsco                           | Ovid                            |
|                                        | Pre/2                              | Near/2         | N2                              | Adj2                            |
|                                        |                                    |                | Separate title / abs (no topic) | Separate title / abs (no topic) |
|                                        |                                    |                |                                 | Automatic phrasing (no """)     |
| <b>NOT ("Animals"[Mesh] or animal)</b> | NOT (INDEXTERMS(animals OR animal) |                |                                 | NOT (exp animal/ or animal)     |

## 2. B) Example search strategy string: PubMed

((("commercial determinant"[Title] OR "commercial involve"[Title] OR "commercial epidemic"[Title] OR "commercial pandemic"[Title] OR "macrosocial determinant"[Title] OR "corporate determinant"[Title] OR "corporate involve"[Title] OR "corporate epidemic"[Title] OR "corporate pandemic"[Title] OR "industry determinant"[Title] OR "industrial determinant"[Title] OR "industrial involve"[Title] OR "industry involve"[Title] OR "industry epidemic"[Title] OR "industrial pandemic"[Title] OR "unhealthy commodit"[Title] OR "harmful commodit"[Title] OR corporatology[Title] AND (english[Filter])) OR (((Food[Title] OR Sugar[Title] OR Transfats[Title] OR "Ultra-process"[Title] OR Alcohol[Title] OR Drink\*[Title] OR Beverage[Title] OR Tobacco[Title] OR Cigarette[Title] OR Nicotine[Title] OR Smok\*[Title] OR Gamb\*[Title] OR Commerc\*[Title] OR "For-profit"[Title] OR Transnational[Title] OR Private[Title]) AND (Industr\*[Title] OR Big[Title] OR Corporat\*[Title] OR Determinant\*[Title] OR Compan\*[Title] OR Firm\*[Title] OR Manufactur\*[Title] OR Organisation\*[Title] OR Organization\*[Title] OR Sector\*[Title] OR Environment[Title]) AND (english[Filter])) AND (Activit\*[Title/Abstract] OR Advertis\*[Title/Abstract] OR Advis\*[Title/Abstract] OR Agreement\*[Title/Abstract] OR Capture[Title/Abstract] OR CDOH[Title/Abstract] OR citizenship[Title/Abstract] OR "Civil society capture"[Title/Abstract] OR Collaborat\*[Title/Abstract] OR Communicat\*[Title/Abstract] OR "Concerned citizenship"[Title/Abstract] OR Conflict\*[Title/Abstract] OR "Constituency building"[Title/Abstract] OR Cooperat\*[Title/Abstract] OR Coopt[Title/Abstract] OR "co-opt"[Title/Abstract] OR "Corporate social responsibility"[Title/Abstract] OR "Corporate-state"[Title/Abstract] OR "Corporation-induced"[Title/Abstract] OR CSR[Title/Abstract] OR Determinant\*[Title/Abstract] OR Deregulat\*[Title/Abstract] OR Donat\*[Title/Abstract] OR "Financial incent\*"[Title/Abstract] OR "Framing dominant"[Title/Abstract] OR Fund\*[Title/Abstract] OR Health[Title/Abstract] OR Influencc\*[Title/Abstract] OR Interact\*[Title/Abstract] OR Invest[Title/Abstract] OR Invested[Title/Abstract] OR Investment[Title/Abstract] OR Investor[Title/Abstract] OR Investing[Title/Abstract] OR Involve\*[Title/Abstract] OR Joint[Title/Abstract] OR Lobby\*[Title/Abstract] OR Neoliberal[Title/Abstract] OR "Neo-liberal"[Title/Abstract] OR "Non-market strateg\*"[Title/Abstract] OR partner\*[Title/Abstract] OR Philanthrop\*[Title/Abstract] OR Playbook[Title/Abstract] OR "Policy capture"[Title/Abstract] OR Power[Title/Abstract] OR Practice\*[Title/Abstract] OR "Preference shaping"[Title/Abstract] OR "Private-public"[Title/Abstract] OR "Public-private"[Title/Abstract] OR Relation\*[Title/Abstract] OR Spinning[Title/Abstract] OR Sponsor\*[Title/Abstract] OR "State-corporate"[Title/Abstract] OR Strateg\*[Title/Abstract] OR Support\*[Title/Abstract] OR Tactic[Title/Abstract] OR Tie[Title/Abstract] AND (english[Filter])) AND (Appraisal[Title/Abstract] OR Categor\*[Title/Abstract] OR Classif\*[Title/Abstract] OR Codif\*[Title/Abstract] OR Conceptuali\*[Title/Abstract] OR Framework[Title/Abstract] OR Mechanism\*[Title/Abstract] OR Model[Title/Abstract] OR Schema[Title/Abstract] OR Taxonom\*[Title/Abstract] OR Theory[Title/Abstract] OR Trend\*[Title/Abstract] OR Typif\*[Title/Abstract] OR Typolog\*[Title/Abstract] OR Overview[Title/Abstract] AND (english[Filter])) AND (english[Filter])) AND (english[Filter])) NOT (Healthcare[Title] OR Hospital[Title] OR Gene[Title] OR Genom\*[Title] OR Genetic\*[Title] OR Genotyp\*[Title] OR Trial[Title] OR Intervention[Title] AND (english[Filter])) AND ((humans[Filter]) AND (english[Filter]))

## 2. C) Database and additional search results (numbers)

| Database                                              | Number of references |
|-------------------------------------------------------|----------------------|
| PubMed                                                | 1,322                |
| EBSCO (CINAHL, Econ Lit)                              | 2,317                |
| OVID (MEDLINE, EMBASE, Global Health, PsycInfo, HMIC) | 4,285                |
| Scopus                                                | 4,857                |
| Web of Science                                        | 7,533                |
| <i>Duplications removed</i>                           | <i>-7,422</i>        |
| <i>Screening process removed</i>                      | <i>-12,833</i>       |
| Snowballing reference lists                           | 9                    |
| Consulting experts                                    | 3                    |
| <i>Selection process removed</i>                      | <i>-24</i>           |
| Total                                                 | 47                   |

**Supplementary Table 3. Study eligibility and selection****Stage 1. Study eligibility**

**3. A)** Is the study eligible to be included in the final review? (brackets = reason for exclusion)

| Eligibility criteria                                                                                                                                                                                                                                                                                                | Yes      | Unclear | No      |
|---------------------------------------------------------------------------------------------------------------------------------------------------------------------------------------------------------------------------------------------------------------------------------------------------------------------|----------|---------|---------|
| 1. Is the study full text and peer reviewed? (publication)                                                                                                                                                                                                                                                          |          |         |         |
| 2. Is the study in English language? (language)                                                                                                                                                                                                                                                                     |          |         |         |
| 3. Does the study focus on <u>any</u> type of harmful industry explicitly, such as one or more of; food, beverage, alcohol, tobacco or gambling (alone or in combination)? (field)<br><i>e.g. we will not include pharmacological industry unless this is combined with an eligible industry in the same study.</i> |          |         |         |
| 4. Is the study aim to capture industry interactions/activity? (focus)                                                                                                                                                                                                                                              |          |         |         |
| 5. Primary outcomes (design)                                                                                                                                                                                                                                                                                        |          |         |         |
| a) Does the study include a framework / classification / description of industry interactions / activities                                                                                                                                                                                                          |          |         |         |
| Final decision on study eligibility                                                                                                                                                                                                                                                                                 | Eligible | Unclear | Exclude |

**Stage 2. Only if the study is Eligible in Stage 1.**

**3. B)** Is the study selected for the review?

| Selection criteria                                                               | Yes      | Unclear | No      |
|----------------------------------------------------------------------------------|----------|---------|---------|
| 1. Is the framework new / novel                                                  |          |         |         |
| 2. Or what framework does this study build upon <i>Detail</i><br>(added novelty) |          |         |         |
| 3. Or other reason for selection <i>Detail</i>                                   |          |         |         |
| Final decision on study selection                                                | Selected | Unclear | Exclude |

**Only studies which (1) meet the study eligibility in Stage 1, and (2) fulfil one of the selection criteria will be selected.**

**Supplementary Table 4. Review and analysis of grey literature****4. A) Grey information search strategies**

|                   |                                                                                      |
|-------------------|--------------------------------------------------------------------------------------|
| <b>Strategy 1</b> | Targeted website searches (local authority [LA] documents)                           |
| <b>Strategy 2</b> | Customized searches of webpages and other online resources                           |
| <b>Strategy 3</b> | Relevant publicly available grey information (including media)                       |
| <b>Strategy 4</b> | Consultation with experts including practitioners working in local authorities (LAs) |

**4. B) Preliminary list of documents**

|                                                                      |                                                                               |
|----------------------------------------------------------------------|-------------------------------------------------------------------------------|
| Budget announcements                                                 | Meeting minutes (funding committee, council meeting of chief executives, GLA) |
| Business rates                                                       | Pension funding                                                               |
| Commercial policies                                                  | Planning permissions                                                          |
| Committee meeting minutes                                            | Position statements                                                           |
| Concerns / praises raised by community                               | Procurement contracts                                                         |
| Contracts, tenders                                                   | Published statements / policies                                               |
| Design papers                                                        | Registers of financial interests                                              |
| Funding streams                                                      | Reports                                                                       |
| General codes of conduct / legal frameworks / rules for interactions | Standards                                                                     |
| Grant requirements                                                   | Sub-contracts                                                                 |
| Impact analyses in local authority portfolio                         | Treasury policy documents                                                     |
| Joint Strategic Needs Assessment                                     | Voluntary initiatives                                                         |
| Licensing (licensing act changes)                                    | Websites                                                                      |

**4. C) Document key search terms (extracted from Part 1 results)**

| <b>Engagement</b>      | <b>Responsibility</b> | <b>Presence</b> | <b>Actors</b>  |
|------------------------|-----------------------|-----------------|----------------|
| <b>Legislation</b>     | Business rate         | Petition        | Shareholders   |
| <b>Acquisition</b>     | Donate                | Advertise       | Business       |
| <b>Agreement</b>       | Fund                  | Brand           | Commercial     |
| <b>Contract</b>        | Investment            | Campaign        | Corporation    |
| <b>Co-regulation</b>   | License               | Consultation    | Franchise      |
| <b>Joint project</b>   | Market                | Forum           | Industry       |
| <b>Joint venture</b>   | Pouring right         | Initiative      | Organisation   |
| <b>Merger</b>          | Rent                  | Promote         | Stakeholder    |
| <b>Partnerships</b>    | Resources             | Roundtable      | Company        |
| <b>Pledge</b>          | Shares                | Think-tank      | Private sector |
| <b>Policy</b>          | Sponsor               | Workshop        |                |
| <b>Self-regulation</b> | Support               | Meeting         |                |

**Supplementary Table 5. Studies eligible but not selected for inclusion in the current study (n=24)**

| Primary author | Year | Title                                                                                                                                                                     | Reasons for not selecting <sup>1</sup> |
|----------------|------|---------------------------------------------------------------------------------------------------------------------------------------------------------------------------|----------------------------------------|
| Baum           | 2016 | Assessing the health impact of transnational corporations: its importance and a framework.                                                                                | Focus                                  |
| Brown          | 2019 | Legislative Capture: A Critical Consideration in the Commercial Determinants of Public Health.                                                                            | Focus                                  |
| De Lacy-Vawdon | 2020 | Defining the commercial determinants of health: a systematic review.                                                                                                      | Content duplication (framework)        |
| Fooks          | 2011 | Corporate social responsibility and access to policy Elites: an analysis of tobacco industry documents.                                                                   | Focus                                  |
| Freudenberg    | 2012 | The manufacture of lifestyle: the role of corporations in unhealthy living                                                                                                | Content duplication (domains)          |
| Gilmore        | 2011 | Public health, corporations and the New Responsibility Deal: promoting partnerships with vectors of disease?                                                              | Content duplication (domains)          |
| Hawkins        | 2018 | Reassessing policy paradigms: A comparison of the global tobacco and alcohol industries.                                                                                  | Content duplication (domains)          |
| Hill           | 2020 | 'As Long as It Comes off as a Cigarette Ad, Not a Civil Rights Message': Gender, Inequality and the Commercial Determinants of Health.                                    | Focus                                  |
| Holden         | 2009 | Corporate Power and Social Policy: The Political Economy of the Transnational Tobacco Companies.                                                                          | Content duplication (domains)          |
| Jernigan       | 2009 | The global alcohol industry: An overview.                                                                                                                                 | Content duplication (domains)          |
| Kadandale      | 2019 | The palm oil industry and non-communicable diseases.                                                                                                                      | Content duplication (framework)        |
| Lacy-Nichols   | 2021 | Power and the commercial determinants of health: ideas for a research agenda.                                                                                             | Content duplication (domains)          |
| Maani          | 2020 | Bringing the commercial determinants of health out of the shadows: a review of how the commercial determinants are represented in conceptual frameworks.                  | Focus or content duplication (domains) |
| Ndebele        | 2020 | Commercial determinants of health: an ethical exploration.                                                                                                                | Focus                                  |
| Paixao         | 2019 | Help or Hindrance? The Alcohol Industry and Alcohol Control in Portugal                                                                                                   | Content duplication (framework)        |
| Richards       | 2015 | Corporate Social Responsibility programs of Big Food in Australia: a content analysis of industry documents.                                                              | Content duplication (domains)          |
| Sacks          | 2013 | A proposed approach to monitor private-sector policies and practices related to food environments, obesity and non-communicable disease prevention.                       | Focus                                  |
| Saloojee       | 2000 | Tobacco industry tactics for resisting public policy on health                                                                                                            | Content duplication (domains)          |
| Swinburn       | 2013 | Monitoring and benchmarking government policies and actions to improve the healthiness of food environments: a proposed Government Healthy Food Environment Policy Index. | Focus                                  |
| Tanrikulu      | 2020 | Corporate political activity of the baby food industry: the example of Nestle in the United States of America.                                                            | Focus                                  |
| Tselengidis    | 2019 | Lobbying against sugar taxation in the European Union: Analysing the lobbying arguments and tactics of stakeholders in the food and drink industries.                     | Content duplication (domains)          |
| Vandenbrink    | 2020 | Strategies used by the Canadian food and beverage industry to influence food and nutrition policies.                                                                      | Content duplication (framework)        |
| Weishaar       | 2012 | Global health governance and the commercial sector: a documentary analysis of tobacco company strategies to influence the WHO framework convention on tobacco control.    | Content duplication (domains)          |
| Williams       | 2015 | Conceptualising the Commercial Determinants of Health Using a Power Lens: A Review and Synthesis of Existing Frameworks                                                   | Content duplication (framework)        |

<sup>1</sup>Reasons correspond with those listed in the PRISMA flow diagram.

**Supplementary Table 6. Description of included studies (n=47)**

| First author       | Year | Title                                                                                                                                                                                             | Design                       | Sources                          | Industry                            | Framework                                               | Context                              | Key term                              | Figure extracted |
|--------------------|------|---------------------------------------------------------------------------------------------------------------------------------------------------------------------------------------------------|------------------------------|----------------------------------|-------------------------------------|---------------------------------------------------------|--------------------------------------|---------------------------------------|------------------|
| <b>Amul</b>        | 2021 | A Systematic Review of Tobacco Industry Tactics in Southeast Asia: Lessons for Other Low- And Middle-Income Regions                                                                               | Review                       | Literature                       | Tobacco                             | Not specified                                           | LMICs                                | CSR                                   | Yes              |
| <b>Anaf</b>        | 2017 | Assessing the health impact of transnational corporations: a case study on McDonald's Australia.                                                                                                  | Case study                   | Document analysis                | Food                                | CHIA                                                    | Australia                            | Globalisation                         | Yes              |
| <b>Babor</b>       | 2013 | Public health, academic medicine, and the alcohol industry's corporate social responsibility activities.                                                                                          | Review                       | Literature                       | Alcohol                             | Health-related CSR                                      | Academia, public health science      | CSR                                   | No               |
| <b>Baker</b>       | 2021 | Globalization, first-foods systems transformations and corporate power: a synthesis of literature and data on the market and political practices of the transnational baby food industry          | Review                       | Literature and industry evidence | Baby food                           | Combination of CDOH, power, lobbying, corporate science | Global baby food                     | CDOH, power                           | Yes              |
| <b>Barraclough</b> | 2008 | A grim contradiction: the practice and consequences of corporate social responsibility by British American Tobacco in Malaysia.                                                                   | Review                       | Document and literature          | Tobacco                             | CSR                                                     | Malaysia                             | CSR                                   | No               |
| <b>Bero</b>        | 2003 | Implications of the Tobacco Industry Documents for Public Health and Policy                                                                                                                       | Review                       | Document analysis                | Tobacco                             | Not specified                                           | Tobacco generally                    | Tactics                               | No               |
| <b>Bunn</b>        | 2020 | The growth of sports betting in Malawi: corporate strategies, public space and public health.                                                                                                     | Media analysis (qualitative) | News and advertising             | Gambling                            | Not specified                                           | Malawi                               | Strategies                            | No               |
| <b>Buse</b>        | 2017 | Healthy people and healthy profits? Elaborating a conceptual framework for governing the commercial determinants of non-communicable diseases and identifying options for reducing risk exposure. | Review                       | Literature                       | UP-food, beverage, alcohol, tobacco | Buse & Naylor                                           | Global health governance             | Commercial determinants of ill-health | No               |
| <b>Campbell</b>    | 2020 | How are frames generated? Insights from the industry lobby against the sugar tax in Ireland.                                                                                                      | Review                       | Document analysis                | Food                                | Framing as CPA                                          | Ireland Sugar sweetened beverage tax | CPA, framing                          | Yes              |



|                      |      |                                                                                                                                                                        |                                 |                                                         |                               |                                                           |                                          |                                          |                            |
|----------------------|------|------------------------------------------------------------------------------------------------------------------------------------------------------------------------|---------------------------------|---------------------------------------------------------|-------------------------------|-----------------------------------------------------------|------------------------------------------|------------------------------------------|----------------------------|
| <b>Canella</b>       | 2015 | Food and beverage industries' participation in health scientific events: considerations on conflicts of interest.                                                      | Case study                      | Event congress                                          | Food & beverage               | Not specified                                             | Scientific events                        | COI                                      | No                         |
| <b>Cavalcanti</b>    | 2019 | Benchmarking food and beverage company investment in healthful eating and active living initiatives                                                                    | Case studies                    | Industry funded initiatives                             | Food & beverage               | Commitment to healthy Communities Initiative              | Corporate investment in community health | Philanthropy, voluntary initiatives, CSR | Yes                        |
| <b>Chavez-Ugalde</b> | 2021 | Conceptualizing the commercial determinants of dietary behaviours associated with obesity: A systematic review using principles from critical interpretative synthesis | Review                          | Literature                                              | Food                          | Commercial determinants of dietary behaviours and obesity | Obesity and food                         | CDOH                                     | Yes                        |
| <b>Clapp</b>         | 2017 | Big Food, Nutritionism, and Corporate Power                                                                                                                            | Review                          | Literature                                              | Food                          | Corporate power in food system                            | Big food generally                       | Power                                    | Yes                        |
| <b>Eastmure</b>      | 2020 | Non-market strategy as a framework for exploring commercial involvement in health policy: A primer.                                                                    | Essay                           | Literature                                              | Corporations                  | Non-market strategy as a conceptual lens                  | Public health generally                  | Non-market strategy                      | No                         |
| <b>Fooks</b>         | 2013 | Corporate philanthropy, political influence and health policy                                                                                                          | Document analysis (qualitative) | Industry documents, dialogue reports                    | Tobacco                       | Built on BAT CSR                                          | Philanthropy and charitable giving       | Corporate political philanthropy         | Only domains               |
| <b>Freudenberg</b>   | 2005 | Public Health Advocacy to Change Corporate Practices: Implications for Health Education. Practice and Research                                                         | Essay                           | Literature                                              | Industry that promote disease | Not specified                                             | Corporations and public health generally | Advocacy Policy                          | Only domains               |
| <b>Hancock</b>       | 2018 | Applying Corporate Political Activity (CPA) analysis to Australian gambling industry submissions against regulation of television sports betting advertising.          | Document analysis (qualitative) | Industry submissions to parliamentary committee inquiry | Gambling                      | Savells CPA gambling perspective                          | Specific regulation                      | CPA                                      | Only recorded new findings |
| <b>Hastings</b>      | 2009 | Tobacco corporate social responsibility and fairy godmothers: the Framework Convention on Tobacco Control slays a modern myth.                                         | Short piece                     | FCTC                                                    | Tobacco                       | CSR                                                       | Tobacco CSR                              | CSR                                      | Yes                        |
| <b>Hunt</b>          | 2020 | How food companies use social media to influence policy debates: a framework of Australian ultra-processed food industry Twitter data                                  | Review                          | Twitter data                                            | Food, UP-food                 | Not specified                                             | Twitter policy debates Australia         | Influence debate, social media           | No                         |

|                       |      |                                                                                                               |                                |                                              |                                                            |                                                                            |                                   |                                                         |                            |
|-----------------------|------|---------------------------------------------------------------------------------------------------------------|--------------------------------|----------------------------------------------|------------------------------------------------------------|----------------------------------------------------------------------------|-----------------------------------|---------------------------------------------------------|----------------------------|
| <b>Jamieson</b>       | 2020 | Oral health inequalities and the corporate determinants of Health: A commentary                               | Short piece                    | Literature                                   | Corporations                                               | Lukes three faces of power and Kickbusch                                   | CDOH oral health                  | Corporate determinants of health CDOH                   | Yes                        |
| <b>Jones</b>          | 2016 | Smokescreens and Beer Goggles: How Alcohol Industry CSM Protects the Industry                                 | Case studies                   | CSM campaigns and literature                 | Tobacco, alcohol                                           | Not specified                                                              | Alcohol CSR                       | Corporate social marketing, cause related marketing     | No                         |
| <b>Kickbusch</b>      | 2016 | The commercial determinants of health.                                                                        | Comment (short piece)          | WHO discussion paper                         | Private sector that provide products detrimental to health | Commercial determinants of health                                          | Global health                     | Industrial epidemic, profit-driven, corporate practices | Yes                        |
| <b>Knai</b>           | 2018 | Systems Thinking as a Framework for Analysing Commercial Determinants of Health.                              | Essay                          | Literature                                   | Unhealthy commodity industries                             | Systems thinking framework (Donella Meadows)                               | UCIs and public health policy     | UCI strategies, cohesive systems approach               | No                         |
| <b>Knai</b>           | 2021 | The case for developing a cohesive systems approach to research across unhealthy commodity industries.        | Review                         | SRs, public information, company websites    | Unhealthy commodity industries                             | CPA taxonomies                                                             | Commercial actors in policymaking | Corporate political strategies                          | No                         |
| <b>Leon</b>           | 2019 | Legitimized fraud and the state-corporate criminology of food - a Spectrum-based theory                       | Theory development             | Critical literature review                   | Food                                                       | Food fraud spectrum-based theory                                           | Big food neoliberal governance    | Fraud, criminology of food, neoliberal, hegemony        | Yes                        |
| <b>Luo</b>            | 2017 | Measuring Corporate Social Responsibility in Gambling Industry: Multi-Items Stakeholder Based Scales          | Tool development               | Literature and qualitative data              | Gambling                                                   | CSR                                                                        | Macau                             | CSR, responsible gambling                               | Yes                        |
| <b>Madureira Lima</b> | 2018 | Corporate practices and health: a framework and mechanisms.                                                   | Essay                          | Literature                                   | TNCs                                                       | Luke's three faces of power – dimensions, vehicles, practices and outcomes | Population health, policy         | Macrosocial, corporate tactics                          | Yes                        |
| <b>Mariath</b>        | 2021 | Sugary drinks taxation: Industry's lobbying strategies, practices, and arguments in the Brazilian legislature | Content analysis (qualitative) | Two public hearings in Brazilian legislature | Food                                                       | INFORMAS (Mialon)                                                          | Brazil                            | CPA, lobbying                                           | Only recorded new findings |

|                    |      |                                                                                                                                                                                      |                          |                             |                                    |                                                                                     |                                                     |                                                            |                            |
|--------------------|------|--------------------------------------------------------------------------------------------------------------------------------------------------------------------------------------|--------------------------|-----------------------------|------------------------------------|-------------------------------------------------------------------------------------|-----------------------------------------------------|------------------------------------------------------------|----------------------------|
| <b>Matthes</b>     | 2021 | Developing more detailed taxonomies of tobacco industry political activity in low-income and middle-income countries: qualitative evidence from eight countries.                     | Interviews (qualitative) | Interview transcripts       | Tobacco                            | Policy dystopia model (Ulucunlar)                                                   | LMICs                                               | LMICS, policy dystopia, political activities               | Only recorded new findings |
| <b>McCambridge</b> | 2018 | Alcohol industry involvement in policymaking: a systematic review.                                                                                                                   | Review                   | Journal reports             | alcohol                            | Savell conceptual model                                                             | Alcohol industry actors in policymaking             | Corporate framing                                          | Only recorded new findings |
| <b>McKee</b>       | 2018 | Revisiting the corporate and commercial determinants of health.                                                                                                                      | Comment (short piece)    | Concepts of CDOH literature | Corporations that determine health | The four ways corporations influence health                                         | Global public health CDOH                           | CDOH, corporate power                                      | No                         |
| <b>Mialon</b>      | 2020 | An overview of the commercial determinants of health.                                                                                                                                | Review                   | Literature                  | Unhealthy commodities              | Kickbusch                                                                           | CDOH generally                                      | CDOH, CPA                                                  | Yes                        |
| <b>Mialon</b>      | 2018 | The policy dystopia model adapted to the food industry: the example of the Nutri-Score saga in France                                                                                | Essay                    | Literature and observations | Food                               | Mialon and Ulucunlar Policy dystopia model                                          | Specific policy Nutri-Score Saga, France            | CPA                                                        | No                         |
| <b>Mialon</b>      | 2015 | A proposed approach to systematically identify and monitor the corporate political activity of the food industry with respect to public health using publicly available information. | Review                   | Literature                  | food                               | CPA of the food industry                                                            | Public health policy                                | CPA                                                        | No                         |
| <b>Miller</b>      | 2010 | Corporate strategy, corporate capture: Food and alcohol industry lobbying and public health.                                                                                         | Essay                    | Literature                  | Food and alcohol                   | Flex network and partnership governance                                             | Public relations and lobbying                       | Corporate power, public relations                          | No                         |
| <b>Milsom</b>      | 2021 | Corporate power and the international trade regime preventing progressive policy action on non-communicable diseases: a realist review                                               | Review                   | Literature                  | Corporate power                    | Fusch and Lederer, Luke three dimensions, Madureira Lima and Galea                  | Transnational health-harmful corporations and power | Trade agreements, liberalization, political economy, power | Yes                        |
| <b>Moodie</b>      | 2013 | Profits and pandemics: prevention of harmful effects of tobacco, alcohol, and ultra-processed food and drink industries.                                                             | Essay                    | Document analysis           | Unhealthy commodities              | Strategies by industry to undermine effective public health policies and programmes | Transnational corporations, international policy    | Hard power, soft power                                     | No                         |

|                  |      |                                                                                                                                       |                                     |                                                          |                             |                                                                                          |                                                           |                                                        |                                   |
|------------------|------|---------------------------------------------------------------------------------------------------------------------------------------|-------------------------------------|----------------------------------------------------------|-----------------------------|------------------------------------------------------------------------------------------|-----------------------------------------------------------|--------------------------------------------------------|-----------------------------------|
| <b>Petticrew</b> | 2020 | Dark Nudges and Sludge in Big Alcohol: Behavioural Economics, Cognitive Biases, and Alcohol Industry Corporate Social Responsibility. | Review                              | Websites and materials of CSR organisations              | Big alcohol                 | Existing Nudge conceptual frameworks: Hollands TIPPE and Thaler and Sunstein's ten types | Alcohol industry CSR and communications                   | Nudges, CSR                                            | Yes                               |
| <b>Rochford</b>  | 2019 | Reframing the impact of business on health: the interface of corporate, commercial, political and social determinants of health.      | Short piece                         | Previous frameworks                                      | Health impacting businesses | Conceptualisation of interactions between business and health                            | CDOH generally                                            | CorDOH and ComDOH                                      | Yes                               |
| <b>Savell</b>    | 2014 | How does the tobacco industry attempt to influence marketing regulations? A systematic review.                                        | Review                              | Literature                                               | Tobacco                     | Hillman and Hitt 1999                                                                    | Tobacco generally                                         | Political activity, tactics, frames                    | No                                |
| <b>Scott</b>     | 2017 | Food and beverage product reformulation as a corporate political strategy.                                                            | Content analysis (qualitative)      | Literature, consultation analysis                        | Food and beverage           | Taxonomy of food and beverage industry corporate political strategies                    | Nutritional reformulation as corporate political strategy | Political strategy, reformulation, framing, narratives | Yes<br>Only recorded new findings |
| <b>Stillman</b>  | 2008 | Mapping tobacco industry strategies in Southeast Asia for action planning and surveillance.                                           | Concept mapping                     | Qualitative analysis of tobacco industry representatives | Tobacco                     | Concept mapping                                                                          | Southeast Asia                                            | Economic, politic, public relations, deception         | Yes<br>Only recorded new findings |
| <b>Thomas</b>    | 2016 | Gambling advocacy: lessons from tobacco, alcohol and junk food                                                                        | Interviews (qualitative)            | Interviews                                               | Gambling                    | Brownell and Warner 2009 strategies by big tobacco and food                              | Australia and New Zealand                                 | Tactics, advocacy                                      | Yes                               |
| <b>Trochim</b>   | 2003 | Development of a model of the tobacco industry's interference with tobacco control programmes.                                        | Concept mapping                     | 34 expert consultations                                  | Tobacco                     | Not specified                                                                            | USA                                                       | Tactics                                                | Yes                               |
| <b>Ulucanlar</b> | 2016 | The Policy Dystopia Model: An Interpretive Analysis of Tobacco Industry Political Activity.                                           | Interpretive analysis (qualitative) | Literature                                               | Tobacco                     | Taxonomy of discursive strategies and arguments used to construct policy dystopia        | Tobacco generally                                         | CPA                                                    | Yes                               |
| <b>Walls</b>     | 2020 | Advancing alcohol research in low-income and middle-income countries: a global alcohol environment framework                          | Review                              | Literature                                               | Alcohol                     | Previous CDOH conceptualisations                                                         | South Africa, LMICs 'local alcohol environment'           | Environment, political, economic,                      | Yes<br>Only recorded              |

|             |      |                                                                                                                         |        |                      |                           |                                                                                                |                                 |                                                                             |                     |
|-------------|------|-------------------------------------------------------------------------------------------------------------------------|--------|----------------------|---------------------------|------------------------------------------------------------------------------------------------|---------------------------------|-----------------------------------------------------------------------------|---------------------|
| <b>Wood</b> | 2021 | Conceptualising the Commercial Determinants of Health Using a Power Lens: A Review and Synthesis of Existing Frameworks | Review | Framework literature | Health-harming industries | Integrated corporate power and health framework (Foucault: origins, nature and manifestations) | CDOH, corporate power generally | regulatory contexts<br>Corporate power, influence, CDOH, corporate strategy | new findings<br>Yes |
|-------------|------|-------------------------------------------------------------------------------------------------------------------------|--------|----------------------|---------------------------|------------------------------------------------------------------------------------------------|---------------------------------|-----------------------------------------------------------------------------|---------------------|

Abbreviations: BAT: British American Tobacco, CDOH: Commercial Determinants Of Health, CHIA: Corporate Health Impact Assessment, COI: Conflict Of Interest, COR/COM: Corporate/Commercial, CPA: Corporate Political Activity, CSM/R: Corporate Social Marketing/Responsibility, FCTC: Framework Convention on Tobacco Control, LMIC: Low-Middle Income Country, SR: Systematic Review, TNC: Transnational Corporation, UCI: Unhealthy Commodity Industry, UP: Ultra-Processed, USA: United States of America, WHO: World Health Organisation.

**Supplementary Table 7. List of example interactions between HCs and English LAs. Retrieved during December 2021-February 2022.**

| Detail of interaction                                                                                                                                                                                                                       | Reference                                                                                                                                                                                                                                                                                                                                                                                                                                                                                          |
|---------------------------------------------------------------------------------------------------------------------------------------------------------------------------------------------------------------------------------------------|----------------------------------------------------------------------------------------------------------------------------------------------------------------------------------------------------------------------------------------------------------------------------------------------------------------------------------------------------------------------------------------------------------------------------------------------------------------------------------------------------|
| The DH public-private partnership with industry to develop programmes intended to tackle the health problems arising from the products those same industries manufacture or distribute.                                                     | Department of Health (2011) Public health responsibility deal. Gov.UK. <a href="https://www.gov.uk/government/news/public-health-responsibility-deal">https://www.gov.uk/government/news/public-health-responsibility-deal</a>                                                                                                                                                                                                                                                                     |
| The Drinkaware Trust, a government-industry partnership on public education campaigns was established by the Portman group                                                                                                                  | Portman Group (2021) Portman Group calls on WHO for renewed focus on harmful drinking and to recognise the industry as a constructive partner. Portmangroup.org. <a href="https://www.portmangroup.org.uk/portman-group-calls-on-who-for-renewed-focus-on-harmful-drinking-and-to-recognise-the-industry-as-a-constructive-partner/">https://www.portmangroup.org.uk/portman-group-calls-on-who-for-renewed-focus-on-harmful-drinking-and-to-recognise-the-industry-as-a-constructive-partner/</a> |
| Previously 'Change4Life', the 'Better health, healthier families' initiative is the DOH anti-obesity campaign, partners include unhealthy industries                                                                                        | Better Health, healthier families (2021) Easy ways to eat well and move more. NHS.UK. <a href="https://www.nhs.uk/healthier-families/">https://www.nhs.uk/healthier-families/</a> .                                                                                                                                                                                                                                                                                                                |
| The 'Childhood Obesity Trailblazer Programme' (COTP) Sugar Smart campaign is a joined force between Lewisham Council and JCDecaux (partnered with, e.g. Coca-cola and McDonalds)                                                            | Lewisham Council (2020) Lewisham Council has joined forces with outdoor advertising companies to tackle childhood obesity. Lewisham.gov.uk. <a href="https://lewisham.gov.uk/articles/news/lewisham-council-has-joined-forces-with-outdoor-advertising-companies-to-tackle-childhood-obesity">https://lewisham.gov.uk/articles/news/lewisham-council-has-joined-forces-with-outdoor-advertising-companies-to-tackle-childhood-obesity</a>                                                          |
| The Mayor of London and Transport for London (TFL) advertisement policy banning junk food advertising on the entire TFL network                                                                                                             | Transport for London (2019) TFL.gov.uk. <a href="https://content.tfl.gov.uk/policy-guidance-food-and-drink-advertising.pdf">https://content.tfl.gov.uk/policy-guidance-food-and-drink-advertising.pdf</a>                                                                                                                                                                                                                                                                                          |
| Primary Authority Partnership between Birmingham City Council and Cadbury Mondelez International, which meant a waiver and cut of the cost of regulatory expenses for packaging changes (£250,000) to reduce unnecessary burden on business | Better Regulation Delivery Office (2014) Primary Authority: A guide for Officials. Department for Business Innovation & Skills. Gov.uk <a href="https://assets.publishing.service.gov.uk/government/uploads/system/uploads/attachment_data/file/583872/14-1058-pa-guide-for-officials.pdf">https://assets.publishing.service.gov.uk/government/uploads/system/uploads/attachment_data/file/583872/14-1058-pa-guide-for-officials.pdf</a>                                                           |
| Westminster City Council inferring their intention to seek commercial opportunities to make up for reduction in central government grants                                                                                                   | Mair, S. (2016) Westminster City Council Annual Accounts 16/17. Westminster.go.uk <a href="https://www.westminster.gov.uk/sites/default/files/annual_accounts_2016-17.pdf">https://www.westminster.gov.uk/sites/default/files/annual_accounts_2016-17.pdf</a> .                                                                                                                                                                                                                                    |
| Coca-Cola Christmas truck permission from LA's to park, host and promote their products in the locality                                                                                                                                     | Sustain (2018) UK loses the taste for the Coke truck . Sustainweb.org. <a href="https://www.sustainweb.org/news/nov18_coke_truck/">https://www.sustainweb.org/news/nov18_coke_truck/</a>                                                                                                                                                                                                                                                                                                           |
| Westminster, alongside City of London were in the LAs with the most betting shops per capita in England. Gambling outlets are in most deprived communities, near gambling treatment centres and schools                                     | Evans, J. and Cross, K. (2021). The Geography of Gambling Premises in Britain. Abrdn.com <a href="https://www.abrdn.com/docs?editionId=c8d6f9b5-1c8b-4b97-9bb4-c3099938f737">https://www.abrdn.com/docs?editionId=c8d6f9b5-1c8b-4b97-9bb4-c3099938f737</a>                                                                                                                                                                                                                                         |
| Scheme as part of the London Healthier Catering Commitments Project encourages food outlets in London to voluntarily apply for an award to commit to offering healthier options                                                             | Haringey London (2022). Healthier Catering Commitment. Haringey.gov.uk <a href="https://www.haringey.gov.uk/social-care-and-health/health/public-health/healthy-haringey/healthier-catering-commitment">https://www.haringey.gov.uk/social-care-and-health/health/public-health/healthy-haringey/healthier-catering-commitment</a> & <a href="https://healthiercateringcommitment.co.uk/">https://healthiercateringcommitment.co.uk/</a>                                                           |
| Coca-Cola investments in the APPG (all-party parliamentary group) partnership with LAs, on a fit and healthy childhood, promotes information about childhood health, including obesity, to inform policy                                    | Coca-Cola GB (2020) Our investments in health and wellbeing research and partnerships – organisations. Coca-cola.co.uk <a href="https://www.coca-cola.co.uk/our-business/company-statements/our-investments-in-health-and-wellbeing-research-and-partnerships">https://www.coca-cola.co.uk/our-business/company-statements/our-investments-in-health-and-wellbeing-research-and-partnerships</a>                                                                                                   |
| Croydon Council purchase of a retail park home to Nando's and McDonalds, to create funding for service and generate income                                                                                                                  | Krause, R. (2019) Council purchases Nando's and McDonald's stores as part of bid to 'protect frontline services'. Yourlocalguardian. <a href="https://www.yourlocalguardian.co.uk/news/17831852.council-purchases-nandos-mcdonalds-stores-part-bid-protect-frontline-services/">https://www.yourlocalguardian.co.uk/news/17831852.council-purchases-nandos-mcdonalds-stores-part-bid-protect-frontline-services/</a>                                                                               |

|                                                                                                                                                                                                                               |                                                                                                                                                                                                                                                                                                                                                                                                                                                                                                                                                                                              |
|-------------------------------------------------------------------------------------------------------------------------------------------------------------------------------------------------------------------------------|----------------------------------------------------------------------------------------------------------------------------------------------------------------------------------------------------------------------------------------------------------------------------------------------------------------------------------------------------------------------------------------------------------------------------------------------------------------------------------------------------------------------------------------------------------------------------------------------|
| Hampshire County Council pension funds in tobacco sector                                                                                                                                                                      | Shaw, A. (2017) Hampshire County Council slammed after £80 million pumped into British American Tobacco. Daily Echo. <a href="https://www.dailyecho.co.uk/news/15323523.hampshire-county-council-slammed-after-80-million-pumped-into-british-american-tobacco/">https://www.dailyecho.co.uk/news/15323523.hampshire-county-council-slammed-after-80-million-pumped-into-british-american-tobacco/</a>                                                                                                                                                                                       |
| Kingston Upon Thames pension fund in industries such as Coca-Cola                                                                                                                                                             | Pension Fund Panel (2012) Pension Fund Annual Report 2011/12. Kingston.gov.uk Enclosure 2 draft Pension Fund Annual report (kingston.gov.uk)                                                                                                                                                                                                                                                                                                                                                                                                                                                 |
| Stratford Council awarding money to Starbucks to improve the appearance of its outlet on the town's historic area                                                                                                             | Lugg, B. (2017) Questions raised over council grant to Starbucks. Stratford Herald. <a href="https://www.stratford-herald.com/news/questions-raised-over-council-grant-to-starbucks-9136669/">https://www.stratford-herald.com/news/questions-raised-over-council-grant-to-starbucks-9136669/</a>                                                                                                                                                                                                                                                                                            |
| 'Project open' personalised business support from Coca-Cola to Lewisham small businesses ('post lockdown local business support')                                                                                             | Fosker, A. (2021) Two Spoons Receives Tailored Support from Coca-Cola to Aid Business Recovery. LewishamLocal. <a href="https://www.lewishamlocal.com/two-spoons-receives-tailored-support-from-coca-cola-to-aid-business-recovery/">https://www.lewishamlocal.com/two-spoons-receives-tailored-support-from-coca-cola-to-aid-business-recovery/</a><br>Coca-Cola Project Open: <a href="https://www.coca-cola.co.uk/community/project-open">https://www.coca-cola.co.uk/community/project-open</a>                                                                                          |
| The Community Alcohol Partnership charity funded by alcohol sellers, linking them to local communities                                                                                                                        | CAP (2020) Community Alcohol partnerships Annual Report 2020. <a href="https://www.communityalcoholpartnerships.co.uk/images/documents/CAP-Annual-Report-2020-9.pdf">https://www.communityalcoholpartnerships.co.uk/images/documents/CAP-Annual-Report-2020-9.pdf</a>                                                                                                                                                                                                                                                                                                                        |
| 'Keep Britain Tidy' partners include Nestle, KFC, McDonalds, Walkers, Pepsi, keep regular communications with members, including LAs – e.g. Wakefield Council (quoted)                                                        | Keep Britain Tidy (2022). Become a member of the keep Britain tidy network. <a href="https://www.keepbritaintidy.org">Keepbritaintidy.org</a> . <a href="https://www.keepbritaintidy.org/local-authorities/become-a-member">https://www.keepbritaintidy.org/local-authorities/become-a-member</a>                                                                                                                                                                                                                                                                                            |
| The 'Neighbourly Community Fund' and 'neighbourly foundation' links industries including Coca-Cola and Heineken with the local community                                                                                      | Neighbourly (2022) Where businesses help local good causes. Neighbourly.com <a href="https://www.neighbourly.com/">https://www.neighbourly.com/</a>                                                                                                                                                                                                                                                                                                                                                                                                                                          |
| Sponsorship agreement between Coca-Cola and Westminster City Council for exclusive rights, licenses and opportunities for sponsorship, advertising, and promotional rights in relation to the recycling bins in public spaces | Westminster City Council (2009) SA Coca-Cola Services NV and Westminster City Council Sponsorship Agreement. <a href="https://www.whatdotheyknow.com/request/120266/response/298881/attach/3/Recycling%20Bin%20Sponsorship%20Agreement.pdf?cookie_passthrough=1">whatdotheyknow.com</a><br><a href="https://www.whatdotheyknow.com/request/120266/response/298881/attach/3/Recycling%20Bin%20Sponsorship%20Agreement.pdf?cookie_passthrough=1">https://www.whatdotheyknow.com/request/120266/response/298881/attach/3/Recycling%20Bin%20Sponsorship%20Agreement.pdf?cookie_passthrough=1</a> |
| Football, premier league, and gambling                                                                                                                                                                                        | BBC News (2018) Does football have a gambling problem? BBC <a href="https://www.bbc.co.uk/bbcthree/article/b542778d-871f-4716-abfb-0afb91fa7770">https://www.bbc.co.uk/bbcthree/article/b542778d-871f-4716-abfb-0afb91fa7770</a>                                                                                                                                                                                                                                                                                                                                                             |
| Cadbury Premier League supporting the local community in which the team belongs – arsenal (Islington local support), Chelsea, Tottenham                                                                                       | Sport Industry Group (2020) Arsenal partner with Cadbury to support local community. Sportindustry.biz <a href="https://www.sportindustry.biz/news/arsenal-partner-cadbury-support-local-community">https://www.sportindustry.biz/news/arsenal-partner-cadbury-support-local-community</a>                                                                                                                                                                                                                                                                                                   |
| Coca-Cola actions on society, including the Community Pub Fund, Youth's Reach Up Programme, FareShare food redistribution                                                                                                     | The Coca-Cola company (2021) Actions on society (our communities). Coca-Cola. <a href="https://www.cocacolaep.com/assets/Sustainability/Documents/1ec8a40410/2020-Action-on-Society-Our-Communities-factsheet.pdf">https://www.cocacolaep.com/assets/Sustainability/Documents/1ec8a40410/2020-Action-on-Society-Our-Communities-factsheet.pdf</a>                                                                                                                                                                                                                                            |
| Tottenham council promoting the use of a joint project with a fried chicken shop to develop and test a new healthier menu                                                                                                     | Public Health England (2018) Healthy High Streets Challenge and Tasters Fried Chicken Shop. Gov.uk <a href="https://www.gov.uk/government/case-studies/healthy-high-streets-challenge-and-tasters-fried-chicken-shop">https://www.gov.uk/government/case-studies/healthy-high-streets-challenge-and-tasters-fried-chicken-shop</a>                                                                                                                                                                                                                                                           |
| The Social Issues Research Centre (SIRC) carries out research on lifestyle issues such as diet, funded by (e.g.) Coca-Cola, Cadbury, Schweppes                                                                                | Social Issues Research Centre (2022) SIRC <a href="http://www.sirc.org/about/about.html">http://www.sirc.org/about/about.html</a>                                                                                                                                                                                                                                                                                                                                                                                                                                                            |

|                                                                                                                                                                                                                                                            |                                                                                                                                                                                                                                                                                                                                                                                                                                                                                                                                                                                                                                                                                                                                         |
|------------------------------------------------------------------------------------------------------------------------------------------------------------------------------------------------------------------------------------------------------------|-----------------------------------------------------------------------------------------------------------------------------------------------------------------------------------------------------------------------------------------------------------------------------------------------------------------------------------------------------------------------------------------------------------------------------------------------------------------------------------------------------------------------------------------------------------------------------------------------------------------------------------------------------------------------------------------------------------------------------------------|
| Coca-Cola Pub Fund to reward a small business or fund a community project as well as a donation to a local charity. The pub award fund was used to refurbish the Victoria Newton in St. Helens Borough                                                     | Mulligan, S. (2021) Coca Cola fund outdoor refurbishment at The Victoria, Newton. St Helens Star. <a href="https://www.sthelensstar.co.uk/news/19246447.coca-cola-fund-outdoor-refurbishment-victoria-newton/">https://www.sthelensstar.co.uk/news/19246447.coca-cola-fund-outdoor-refurbishment-victoria-newton/</a>                                                                                                                                                                                                                                                                                                                                                                                                                   |
| Coca-Cola GB ParkLives partnership with LAs and charity partner StreetGames, investing in pitches and coaches across UK cities<br>Camborne Town Council promoting Streetgames                                                                              | Coca-Cola GB (2022) Ball games allowed. Coca-Cola Great Britain. <a href="https://www.coca-cola.co.uk/community/streetgames/ball-games-allowed">https://www.coca-cola.co.uk/community/streetgames/ball-games-allowed</a><br>Camborne Town Council (2022) ParkPlay Camborne Free Activity Mornings. Parkplay. Events Camborne Town Council <a href="https://www.camborne-tc.gov.uk/events/parkplay-camborne-free-activity-mornings">ps://www.camborne-tc.gov.uk/events/parkplay-camborne-free-activity-mornings</a>                                                                                                                                                                                                                      |
| Birmingham City Council promoting ParkLives and direct relation to Coca-Cola                                                                                                                                                                               | Birmingham City Council (2017) Fun, free outdoor activities on offer with Parklives return. Birmingham.gov <a href="https://www.birmingham.gov.uk/news/article/66/fun_free_outdoor_activities_on_offer_with_parklives_return">https://www.birmingham.gov.uk/news/article/66/fun_free_outdoor_activities_on_offer_with_parklives_return</a>                                                                                                                                                                                                                                                                                                                                                                                              |
| Cadbury campaign to drive customers to purchase locally, playing to their origins as a small business, and to benefit their partnerships with high street brands<br>Suffolk council endorsing the Change4Life campaign                                     | McCarthy, J. (2021) Cadbury urges support for high street chocolate stores with rework of 'Mum's Birthday' ad. The Drum News. <a href="https://www.thedrum.com/news/2021/04/28/cadbury-urges-support-high-street-chocolate-stores-with-rework-mum-s-birthday-ad">https://www.thedrum.com/news/2021/04/28/cadbury-urges-support-high-street-chocolate-stores-with-rework-mum-s-birthday-ad</a><br>Suffolk County Council (2016) Parents encouraged to get Sugar Smart. Suffolk.gov <a href="https://www.suffolk.gov.uk/council-and-democracy/council-news/show/parents-in-suffolk-encouraged-to-get-sugar-smart">https://www.suffolk.gov.uk/council-and-democracy/council-news/show/parents-in-suffolk-encouraged-to-get-sugar-smart</a> |
| Coca-Cola consultancy, educational grants, donations and membership of British Nutrition Foundation                                                                                                                                                        | Coca-Cola GB (2020) Our investments in health and wellbeing research and partnerships – organisations. Coca-cola.co.uk <a href="https://www.coca-cola.co.uk/our-business/company-statements/our-investments-in-health-and-wellbeing-research-and-partnerships">tps://www.coca-cola.co.uk/our-business/company-statements/our-investments-in-health-and-wellbeing-research-and-partnerships</a>                                                                                                                                                                                                                                                                                                                                          |
| Coca-Cola investment and partnership in British Dietetic Association regarding evidence review on Stevia                                                                                                                                                   | Coca-Cola GB (2020) Our investments in health and wellbeing research and partnerships – organisations. Coca-cola.co.uk <a href="https://www.coca-cola.co.uk/our-business/company-statements/our-investments-in-health-and-wellbeing-research-and-partnerships">tps://www.coca-cola.co.uk/our-business/company-statements/our-investments-in-health-and-wellbeing-research-and-partnerships</a>                                                                                                                                                                                                                                                                                                                                          |
| Coca-Cola partnership with Nova International Conference on Healthy eating and Physical activity                                                                                                                                                           | Coca-Cola GB (2020) Our investments in health and wellbeing research and partnerships – organisations. Coca-cola.co.uk <a href="https://www.coca-cola.co.uk/our-business/company-statements/our-investments-in-health-and-wellbeing-research-and-partnerships">tps://www.coca-cola.co.uk/our-business/company-statements/our-investments-in-health-and-wellbeing-research-and-partnerships</a>                                                                                                                                                                                                                                                                                                                                          |
| Coca-Cola industry membership in the Diet and Health Research Industry Club (DRINC), which funds research about diet and health<br>BET365 support young people's gambling harm prevention programme, including education, treatment and community projects | UKRI (2022) The Diet and Health Research Industry Club (DRINC). <a href="https://www.ukri.org/about-us/bbsrc/who-we-are/sharing-challenges/drinc/">https://www.ukri.org/about-us/bbsrc/who-we-are/sharing-challenges/drinc/</a><br>Patel, J. (2021) BGC praises gambling industry's "huge contribution" across corporate social responsibility initiatives. Gambling Spotlight. <a href="https://www.gamblingspotlight.com/bgc-praises-gambling-industrys-huge-contribution-across-corporate-social-responsibility-initiatives/">https://www.gamblingspotlight.com/bgc-praises-gambling-industrys-huge-contribution-across-corporate-social-responsibility-initiatives/</a>                                                             |
| The Cadbury Foundation, mostly through grant making, operating in UK LAs, for example, Birmingham and City of London                                                                                                                                       | Charity Commission for England and Wales (2022) The Cadbury Foundation. Charity Commission <a href="https://register-of-charities.charitycommission.gov.uk/charity-search/-/charity-details/1050482/what-who-how-where">https://register-of-charities.charitycommission.gov.uk/charity-search/-/charity-details/1050482/what-who-how-where</a>                                                                                                                                                                                                                                                                                                                                                                                          |
| Cadbury Mondelez foundation awards funding to community studio in Oswestry Town                                                                                                                                                                            | Mondelez International (2021) Local community studio receives £5,000 from The Cadbury Foundation. My news desk.com <a href="https://www.mynewsdesk.com/uk/mondelez-uk/pressreleases/local-community-studio-receives-5000-pounds-from-the-cadbury-foundation-3107455">https://www.mynewsdesk.com/uk/mondelez-uk/pressreleases/local-community-studio-receives-5000-pounds-from-the-cadbury-foundation-3107455</a>                                                                                                                                                                                                                                                                                                                        |



|                                                                                                                                                                                                                                                                  |                                                                                                                                                                                                                                                                                                                                                                                                                                                                                                                                                                                                                                |
|------------------------------------------------------------------------------------------------------------------------------------------------------------------------------------------------------------------------------------------------------------------|--------------------------------------------------------------------------------------------------------------------------------------------------------------------------------------------------------------------------------------------------------------------------------------------------------------------------------------------------------------------------------------------------------------------------------------------------------------------------------------------------------------------------------------------------------------------------------------------------------------------------------|
| Pepsi acquired Quaker, which is partnered with the charity 'Magic Breakfast', bringing breakfast to children across the UK<br>Mars strategic partnership with 'KIND' brand as part of health drive – healthy and philanthropic social responsibility initiatives | Molyneux, C. (2021) Quaker and Pro Green join forces with magic breakfast. <a href="https://www.pepsico.co.uk/news/stories/quaker-and-pro-green-join-forces">Pepsico.co.uk https://www.pepsico.co.uk/news/stories/quaker-and-pro-green-join-forces</a><br>KIND (2022) KIND and Mars Announce Next Step in Partnership to Build a Kinder World and Bring Healthy Snacks to People Worldwide. <a href="https://www.kindsnacks.com/kind-mars-partnership.html">Kindsnacks. https://www.kindsnacks.com/kind-mars-partnership.html</a>                                                                                              |
| Gov.uk promoting the magic breakfast activities                                                                                                                                                                                                                  | Department for Education & Ford, V. (2020). Thousands of children offered nutritious breakfasts during summer. <a href="https://www.gov.uk/government/news/thousands-of-children-offered-nutritious-breakfasts-during-summer">Gov.uk https://www.gov.uk/government/news/thousands-of-children-offered-nutritious-breakfasts-during-summer</a>                                                                                                                                                                                                                                                                                  |
| Coca-Cola London Eye promoted on Lambeth Council website                                                                                                                                                                                                         | Lambeth Council (2022) The Coca Cola London Eye. <a href="https://beta.lambeth.gov.uk/choose-love/venues/licensed-venues/coca-cola-london-eye">Lambeth.gov. https://beta.lambeth.gov.uk/choose-love/venues/licensed-venues/coca-cola-london-eye</a>                                                                                                                                                                                                                                                                                                                                                                            |
| McDonalds 'good times' summer activities promoted on Lambeth Council website                                                                                                                                                                                     | Lambeth Council (2016) McDonald's, Good Times Brand Summertime Activation. <a href="https://www.lambeth.gov.uk/events/mcdonalds-good-times-brand-summertime-activation">Lambeth.gov. https://www.lambeth.gov.uk/events/mcdonalds-good-times-brand-summertime-activation</a>                                                                                                                                                                                                                                                                                                                                                    |
| Lewisham collaborative programme to ban HFSS food advertising from council owned advertising spaces                                                                                                                                                              | Witton, B. (2019) Junk food advertising ban set to help Lewisham fight obesity. <a href="https://www.newsshopper.co.uk/news/17393374.junk-food-advertising-ban-set-help-lewisham-fight-obesity/">News Shopper. https://www.newsshopper.co.uk/news/17393374.junk-food-advertising-ban-set-help-lewisham-fight-obesity/</a>                                                                                                                                                                                                                                                                                                      |
| The Betting and Gaming Council issues warning about the dangers posed by the unregulated and illegal online black market in gambling. Members of the BGC include 90% of all the UK's licensed gambling businesses (including online gaming)                      | The BGC (2022) The Betting and Gaming Council issues warning about the dangers posed by the unregulated and illegal online black market in gambling. <a href="https://bettingandgamingcouncil.com/campaigns/the-betting-and-gaming-council-issues-warning-about-the-dangers-posed-by-the-unregulated-and-illegal-online-black-market-in-gambling">The Betting and Gaming Council. https://bettingandgamingcouncil.com/campaigns/the-betting-and-gaming-council-issues-warning-about-the-dangers-posed-by-the-unregulated-and-illegal-online-black-market-in-gambling</a>                                                       |
| Westminster McDonalds Franchisee, Capital Arches Group Ltd, owned by Claude Abi-Gerges, promotes connections with community and LA McDonald's litigation case against Newport Carmarthenshire Council                                                            | Westminster (2020) Capital Arches Group – Your Local McDonald's Franchisee. <a href="https://committees.westminster.gov.uk/documents/s34780/3.1j%20-%20CAG%20Bio.pdf">Westminster.gov. https://committees.westminster.gov.uk/documents/s34780/3.1j%20-%20CAG%20Bio.pdf</a><br>Youle, R. (2020) Council facing costs bill after rejecting drive-thru McDonald's and Costa coffee development. <a href="https://www.walesonline.co.uk/news/wales-news/planning-costs-carmarthenshire-council-news-18401531">Wales online. https://www.walesonline.co.uk/news/wales-news/planning-costs-carmarthenshire-council-news-18401531</a> |
| Bristol Council refused to partner with Clean up Britain campaign, which receives funding from Phillip Morris Tobacco                                                                                                                                            | Bloch, B. (2022) Drones and AI being used to clean up Bristol. <a href="https://www.bristolpost.co.uk/news/bristol-news/drones-ai-being-used-clean-6526063?utm_source=twitter.com&amp;utm_medium=social&amp;utm_campaign=sharebar">Bristol Post. https://www.bristolpost.co.uk/news/bristol-news/drones-ai-being-used-clean-6526063?utm_source=twitter.com&amp;utm_medium=social&amp;utm_campaign=sharebar</a>                                                                                                                                                                                                                 |
| Tobacco acting as the solution, with illicit trade campaigns which links them with local police, and reduce necessity for funding to go into enforcing illicit trade                                                                                             | Phillip Morris International (2022) Collaboration remains the key to success in the fight against illicit trade. <a href="https://www.pmi.com/illicit-trade-prevention/collaboration-remains-the-key-to-success-in-the-fight-against-illicit-trade">PMI.com https://www.pmi.com/illicit-trade-prevention/collaboration-remains-the-key-to-success-in-the-fight-against-illicit-trade</a>                                                                                                                                                                                                                                       |
| LA investment portfolios and commercial borrowing (e.g. from banks, building societies) which also have harmful commodity industries as clients                                                                                                                  | National Audit Office (2020) Local authority investment in commercial property. <a href="https://www.nao.org.uk/report/local-authority-investment-in-commercial-property/">NAO.org https://www.nao.org.uk/report/local-authority-investment-in-commercial-property/</a>                                                                                                                                                                                                                                                                                                                                                        |
| Asda supermarket (which sells harmful products e.g. alcohol) owned by Mole Valley District Council Dorking. The council receives annual rental income                                                                                                            | West, K. (2019) The supermarket in Wales owned by a small council...in Surrey. <a href="https://www.theguardian.com/business/2019/jan/26/small-supermarket-wales-owned-surrey-casino-property">The guardian. https://www.theguardian.com/business/2019/jan/26/small-supermarket-wales-owned-surrey-casino-property</a>                                                                                                                                                                                                                                                                                                         |

|                                                                                                                                       |                                                                                                                                                                                                                                                                                                                        |
|---------------------------------------------------------------------------------------------------------------------------------------|------------------------------------------------------------------------------------------------------------------------------------------------------------------------------------------------------------------------------------------------------------------------------------------------------------------------|
| Spelthorne Borough Council bought BP on Sunbury-on Thames campus                                                                      | West, K. (2019) The supermarket in Wales owned by a small council...in Surrey. The guardian. <a href="https://www.theguardian.com/business/2019/jan/26/small-supermarket-wales-owned-surrey-casino-property">https://www.theguardian.com/business/2019/jan/26/small-supermarket-wales-owned-surrey-casino-property</a> |
| Court overturns Local Government Pension Scheme investment ban from companies which profit from harmful products                      | UNISON (2020) UNISON welcomes Supreme Court decision on ethical LGPS investment. Unison.org. <a href="https://www.unison.org.uk/news/article/2020/04/lgps-court/">https://www.unison.org.uk/news/article/2020/04/lgps-court/</a>                                                                                       |
| LA services outsourced to third party providers with harmful industry links / influenced by industry (e.g. Capital Public Service)    | Capita (2022) Improving lives with efficient local government services. Capita.com <a href="https://www.capita.com/industries/government/local-government">https://www.capita.com/industries/government/local-government</a>                                                                                           |
| Burger King franchise long-term contract with Cambridge Addenbrooke hospital                                                          | NHS Cambridge University Hospitals (2022) Shops, Cafes and restaurants. Cuh.NHS.uk <a href="https://www.cuh.nhs.uk/visiting-our-hospitals/shops-cafes-restaurants/">https://www.cuh.nhs.uk/visiting-our-hospitals/shops-cafes-restaurants/</a>                                                                         |
| Diabetes UK partnership with Britvic (brands include Mountain Dew, Pepsi, tango, Whites) to support children's educational programmes | Diabetes UK (2018) We've joined forces with Britvic in a three-year partnership. Diabetes.org.uk <a href="https://www.diabetes.org.uk/about-us/news/britvic-three-year-partnership">https://www.diabetes.org.uk/about-us/news/britvic-three-year-partnership</a>                                                       |

*Abbreviations: LA: Local Authority, PR: Public Relations, BC: Borough Council, CC: County/City Council, NGO: Non-Government Organisation, DOH: Department Of Health, PHE: Public Health England, HFSS: foods High in Fat, Sugar and Salt .*
